# Supplementary material for: Adsorptive avidity of Prussian blue polypyrrole nanocomposite for elimination of water contaminants: a case study of malachite green and isoniazid
Source: Royal Society of Chemistry journal article supplement (doi:10.1039/d4cp01053a), 2024-01-01
Supplement: d4cp01053a1.pdf [file d4cp01053a1.pdf]

ARTICLE

## Adsorptive Avidity of Prussian blue Polypyrrole Nanocomposite for Elimination of Water Contaminants: a Case study of Malachite Green and Isoniazid

Tabee Jan,<sup>a</sup> Shabnam Raheem,<sup>a</sup> Aamir Hanif,<sup>b</sup> Gauthier Rydzek,<sup>c</sup> G.M. Peerzada,<sup>a</sup> Katsuhiko Ariga,<sup>d,e</sup> Jin Shang,<sup>f</sup> Masood Ahmad Rizvi.<sup>a\*</sup>

### Supplementary Data:

**Figure S1:** TGA/DTA analysis of PB and PPY

**Figure S2:** XRD patterns of PPY, PB and PPY/PB nanocomposite powders

**Figure S3.** Elemental mapping images of C,N and Fe of PB

**Figure S4.** Elemental mapping images of C,N and Fe of PPY/PB nanocomposite

**Figure S5:** Effect of the initial adsorbate concentration and adsorbent dose on the adsorption capacity of PPY/PB nanocomposite

**Figure S6:** Non-linear fitted curves of isotherm models

**Figure S7:** Effect of temperature on the removal efficiency of M.G. and INH

**Figure S8:** Adsorption studies of M.G. and INH in real water samples and assessment of the reusability of the PPY/PB nanocomposite

**Figure S9.** Stability of PPY/PB nanocomposite under harsh conditions (pH=7 and 9) (A) FTIR spectra and (B) Tauc plot for band gap( $E_g$ ) calculation through Diffuse Reflectance Spectroscopy(DRS)

**Figure S10.** Effect on removal efficiency in a ternary mixture of M.G. INH, and 4 NP using PPY/PB under optimized conditions.

**Figure S11:** UV-Vis analysis of 4-NP in the presence of PPY/PB catalyst under visible light and dark conditions

**Figure S12:** Photograph showing the color change indicative of the conversion of 4-NP to 4-AP in the presence of PPY/PB catalyst

**Figure S13:** Pseudo first order kinetic plots and evolution of the conversion rate of 4-NP to 4-AP at different PPY/PB dosages.

**Figure S14:** UV-Vis analysis of 4-NP at constant concentration of 4-NP and catalyst by varying  $[\text{NaBH}_4]$ . Evolution of their Pseudo-first order kinetic plots and comparison of their apparent rate constants

**Figure S15:** UV-Vis analysis of 4-NP in the presence of fixed amount of  $\text{NaBH}_4$  and catalyst at different  $[\text{4-NP}]$ . Evolution of their Pseudo-first order kinetic plots and comparison of their apparent rate constants

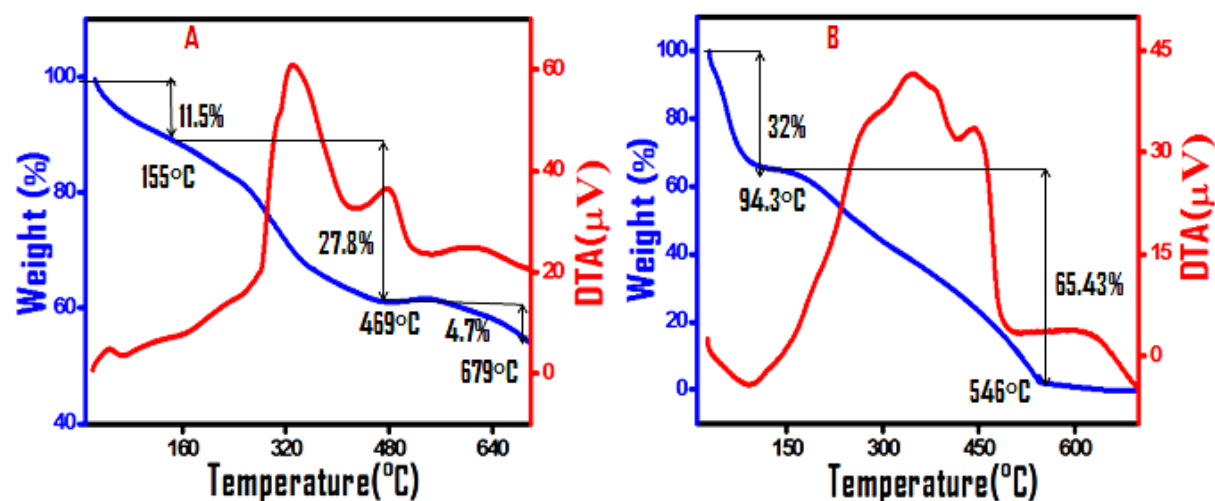

**Figure S1.** TGA/DTA analysis of (A) PB nanoparticles depicting three loss steps, and (B) PPY showing two loss steps.

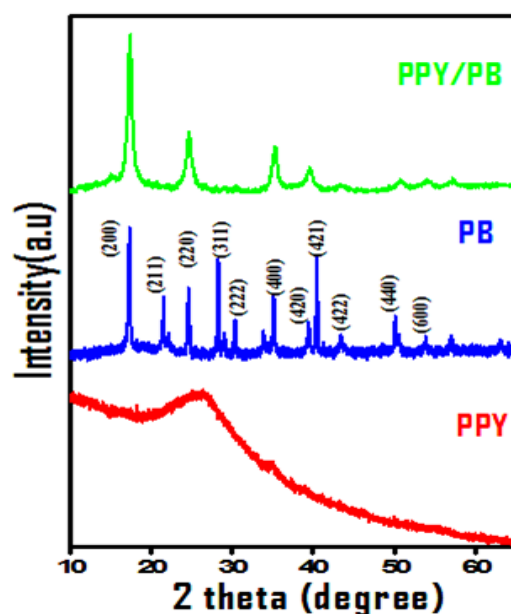

**Figure S2.** XRD patterns of PPY, PB and of the PPY/PB nanocomposite

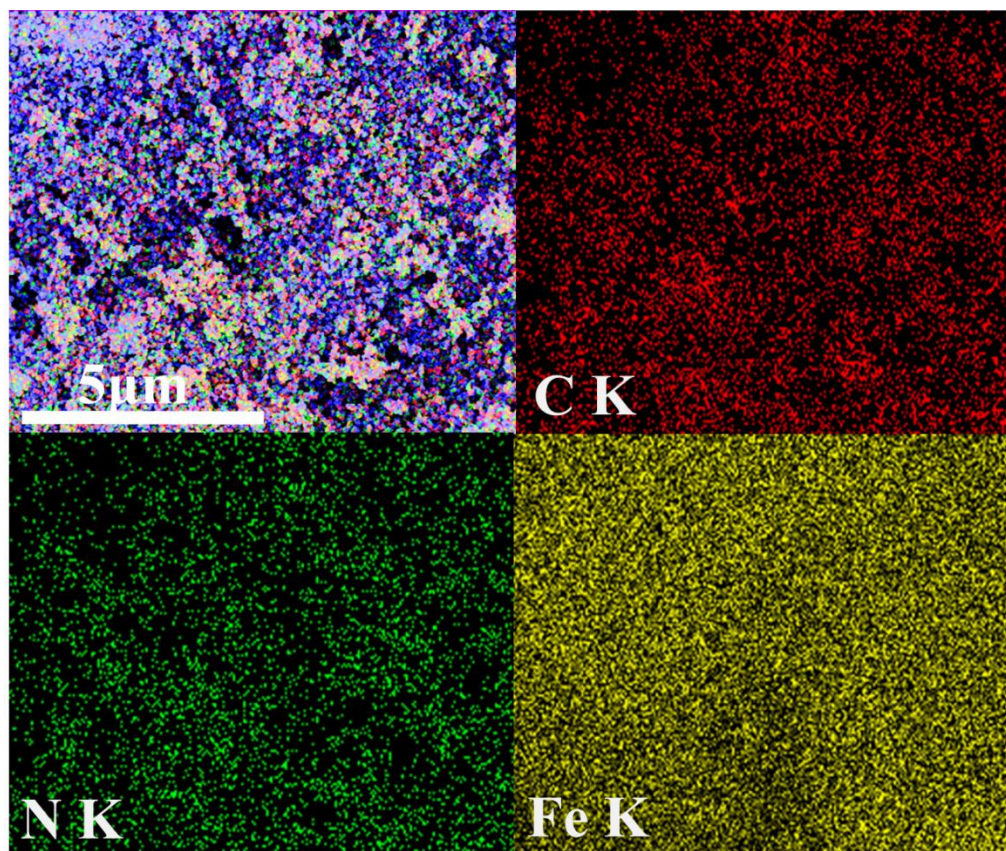

**Figure S3.** Elemental mapping images of C,N and Fe of PB

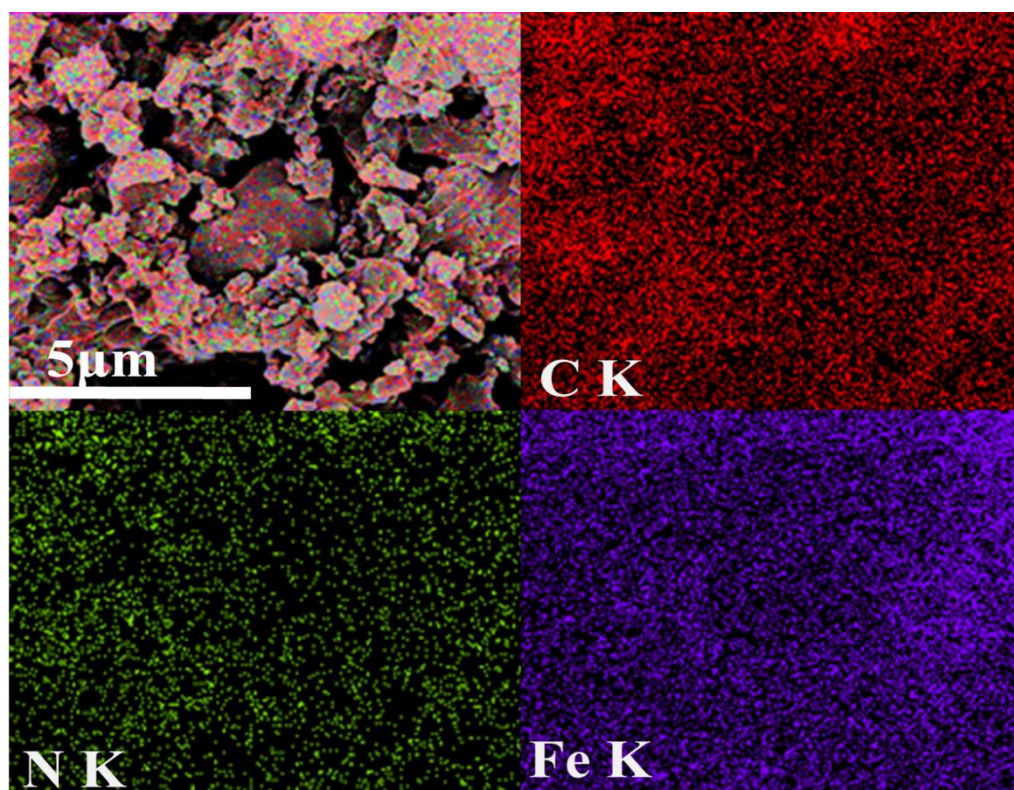

**Figure S4.** Elemental mapping images of C,N and Fe of PPY/PB nanocomposite

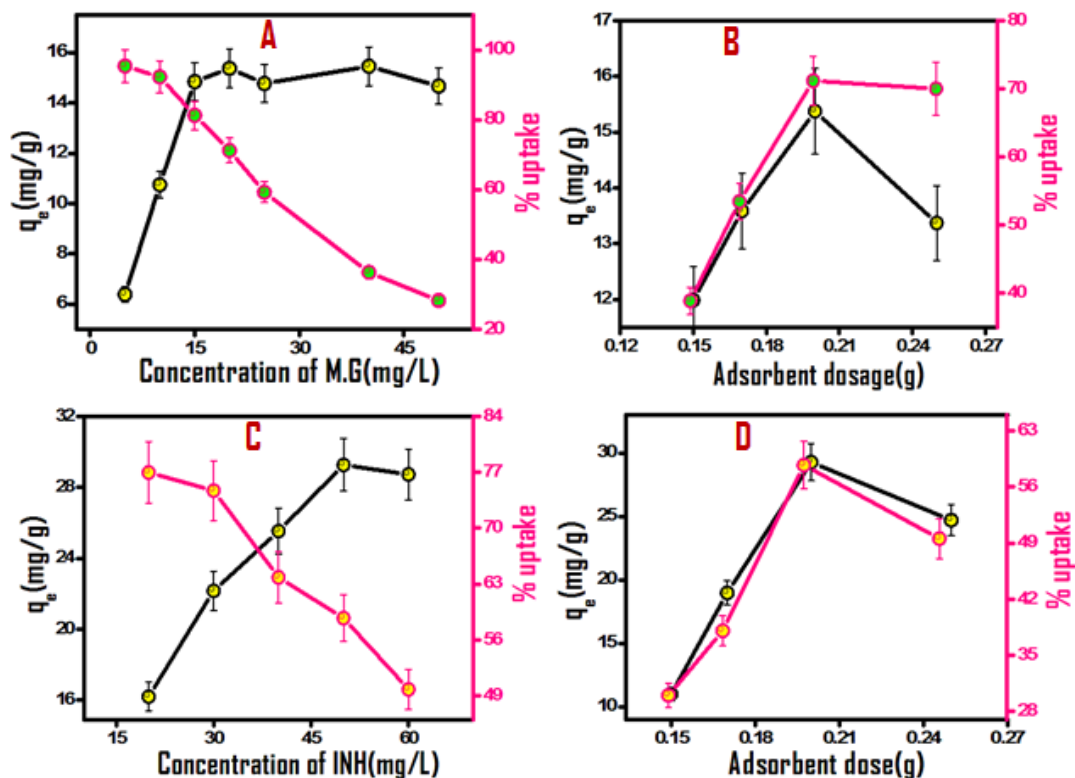

**Figure S5.** Effect of the initial adsorbate concentration on the adsorption capacity of PPY/PB towards (A) M.G and (C) INH. Concentration conditions of  $C_i = 5\text{--}30$  mg/L (M.G.) and  $10\text{--}60$  mg/L (INH) were used at  $T = 298$  K, pH 7. Contact times of 400 min (M.G.) and 360 min (INH) were used with  $V = 200$  mL, and a PPY/PB dose of 1 mg/mL. Adsorbent dose effect on the removal efficiency of (B) M.G and (D) INH under conditions of  $C_i = 20$  mg/L (M.G.) and 50 mg/L (INH) after 400 min (M.G.) and 360 min (INH) of contact time. The total volume was 200 mL with a PPY/PB dose of 150–250 mg

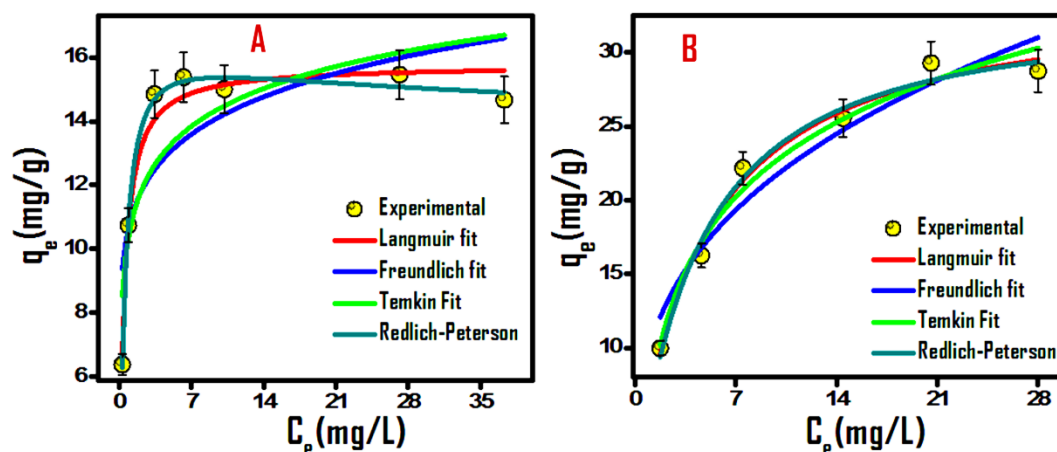

**Figure S6** Non-linear fitted curves of isotherm models for (A) M.G and (B) INH under conditions of  $C_i = 5\text{--}40$  mg/L (M.G.) and  $10\text{--}60$  mg/L (INH). Experiments were carried out at pH7,  $T = 298$  K, using a 200 mL of a 1 mg/mL PPY/PB dispersion with a contact time of 400 min (M.G.) and 360 min (INH).

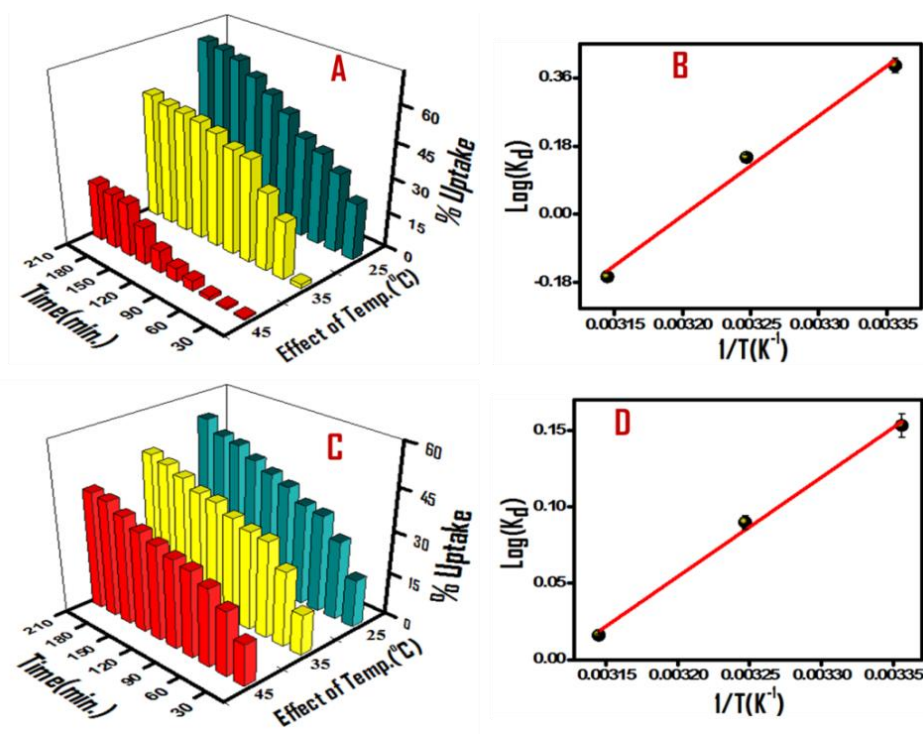

**Figure S7.** Effect of the temperature on the removal efficiency of (A) M.G. and (C) INH under conditions of  $C_i=20$  mg/L (M.G) and 50 mg/L(INH) at pH 7 and  $T=298-318$ K. Experiments were carried out using 200 mL of a 1 mg/mL PPY/PB dispersion with a contact time of 20 to 200 min. Van't Hoff plots for calculation of thermodynamic parameters regarding the sorption of (B) M.G. and (D) INH.

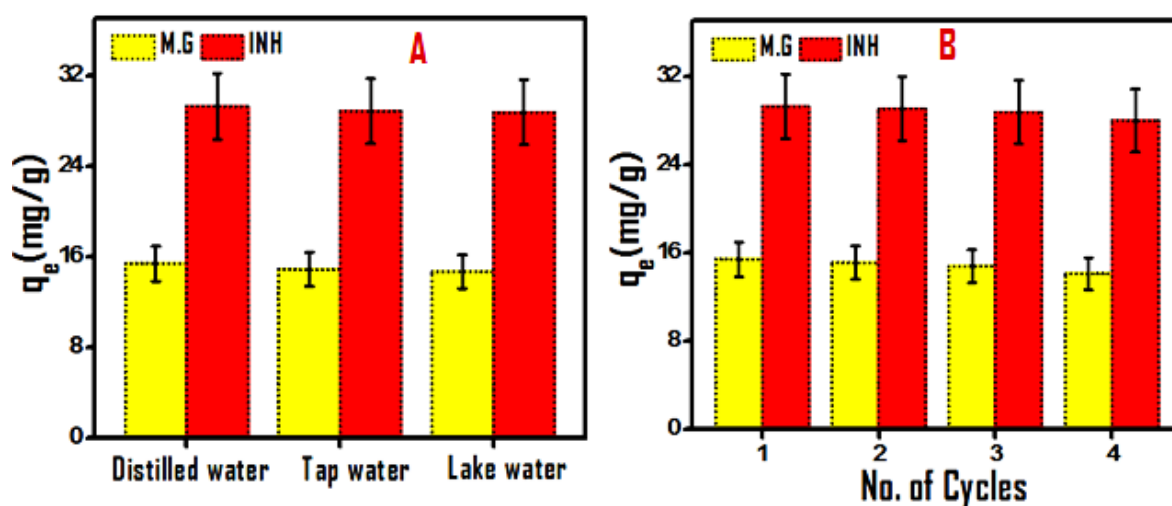

**Figure S8.** (A) Adsorption of M.G and INH onto the PPY/PB nanocomposite in real water samples. (B) Reusability of PPY/PB nanocomposite after M.G. and INH adsorption

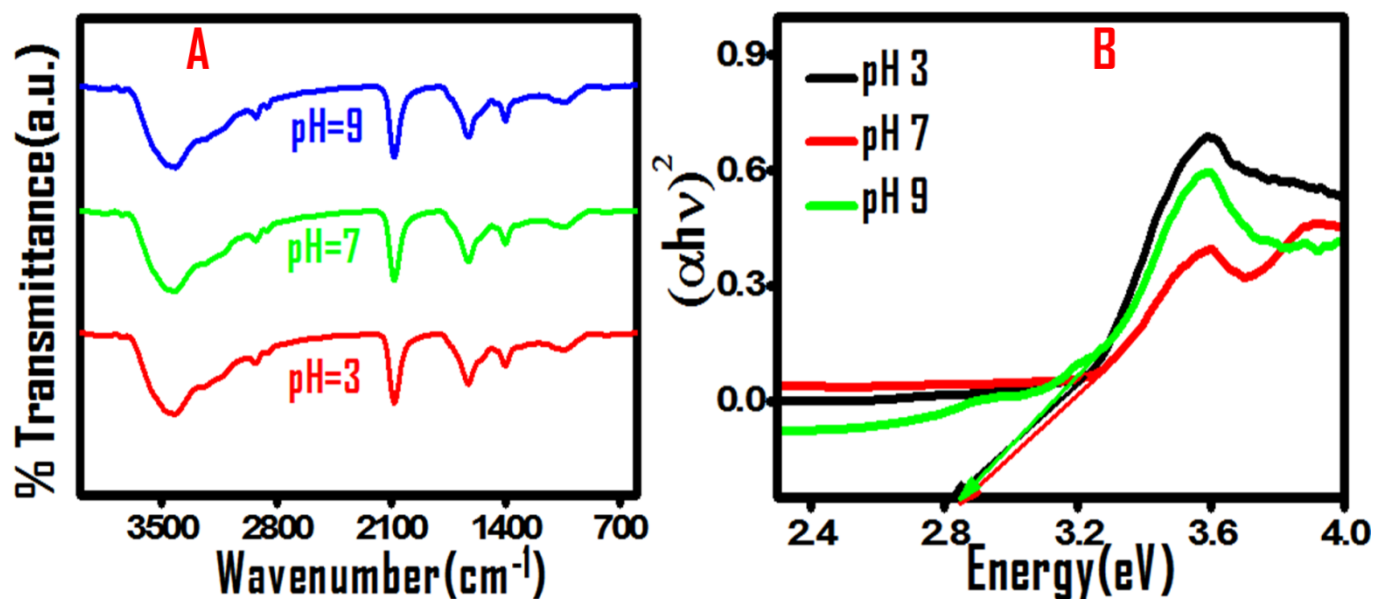

**Figure S9.** Stability of PPY/PB nanocomposite under harsh conditions (pH=3 and 9) (A) FTIR spectra and (B) Tauc plot for band gap ( $E_g$ ) calculation through Diffuse Reflectance Spectroscopy (DRS)

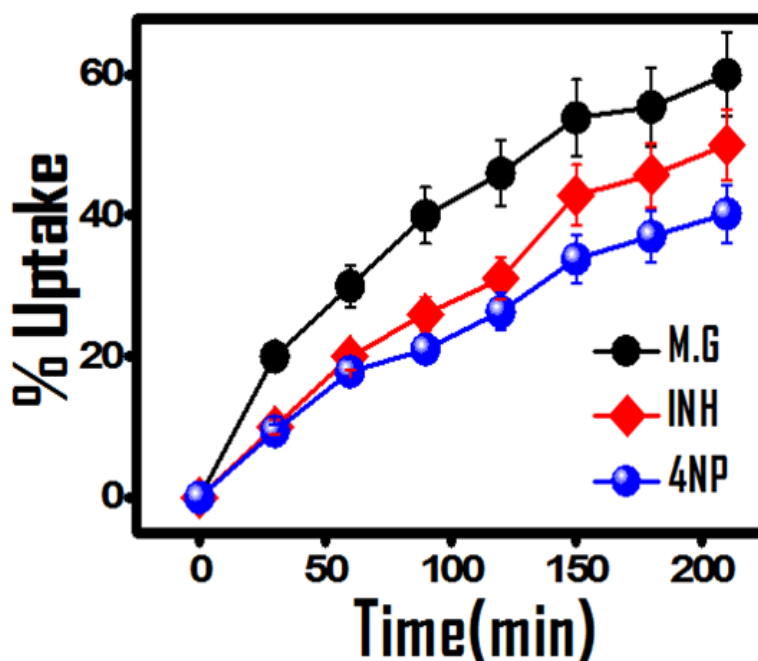

**Figure S10.** Effect on removal efficiency in a ternary mixture of M.G, INH, and 4 NP using PPY/PB under optimized conditions.

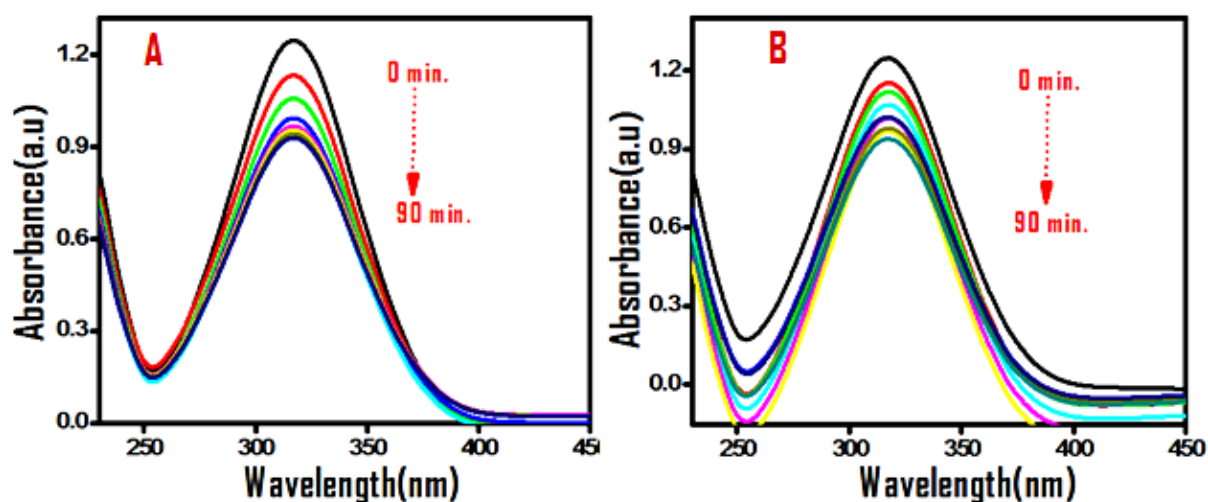

**Figure S11.** Time dependent UV-Vis analysis of 4-NP in the presence of PPY/PB catalyst under (A) visible light irradiation and (B) dark conditions.

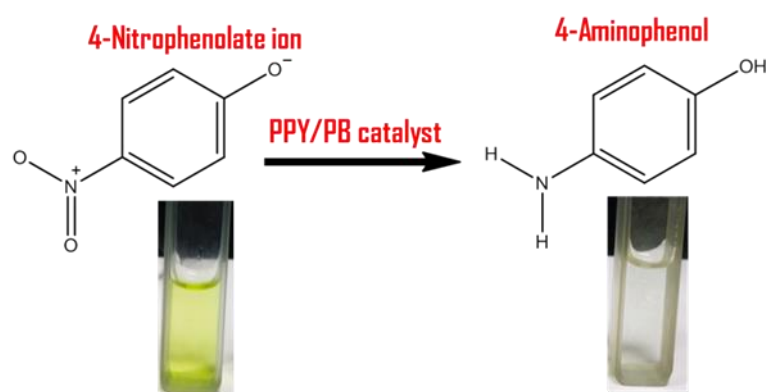

**Figure S12.** Color change indicating the conversion of 4-NP to 4-AP in the presence of PPY/PB catalyst

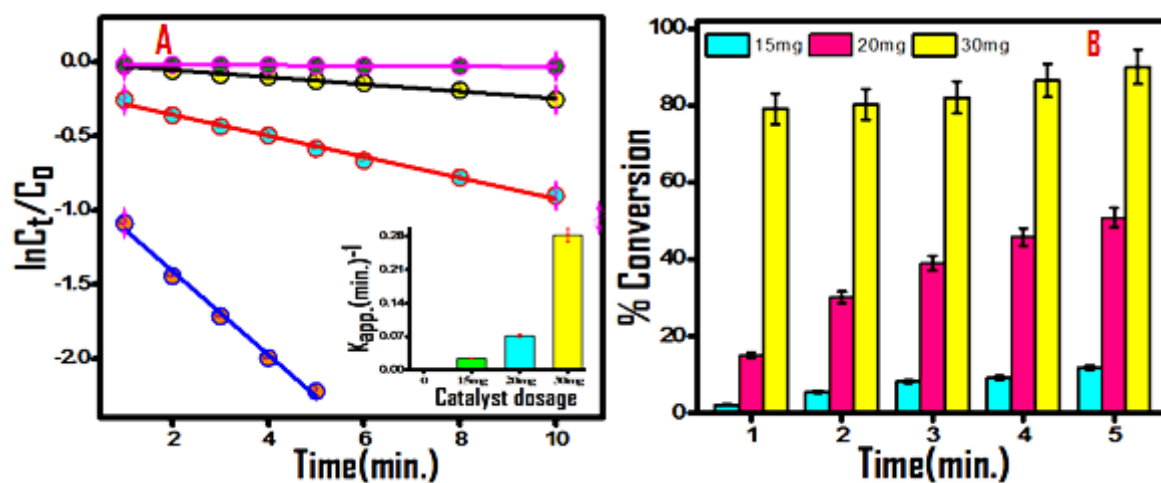

**Figure S13** (A) Pseudo first order kinetic plots and (B) conversion rate of 4-NP (0.1mM) to 4-AP at different time intervals in the presence of different dosage of PPY/PB catalyst .

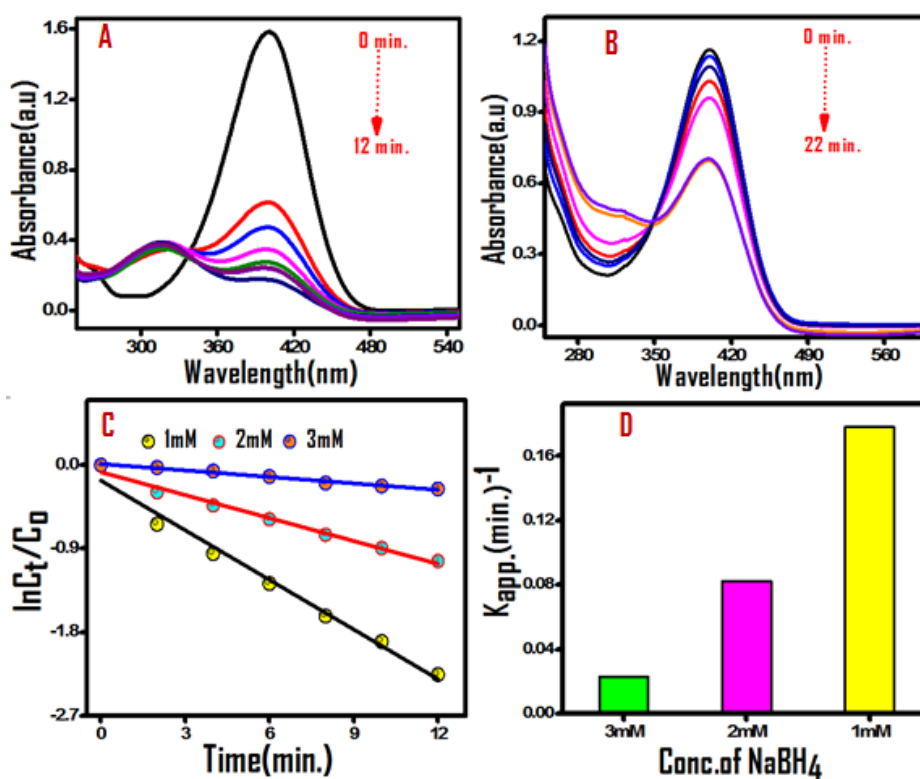

**Figure S14.** Time dependent UV-Vis analysis of 4-NP in the presence of fixed amount of 4-NP and PPY/PB catalyst (0.1 mM, 20 mg) at different concentrations of NaBH<sub>4</sub>: (A) 1 mM and (B) 3 mM). (C) Pseudo-first order kinetic plot and (D) comparison of apparent rate constants obtained from the slope of pseudo-first order fit at different NaBH<sub>4</sub> concentrations.



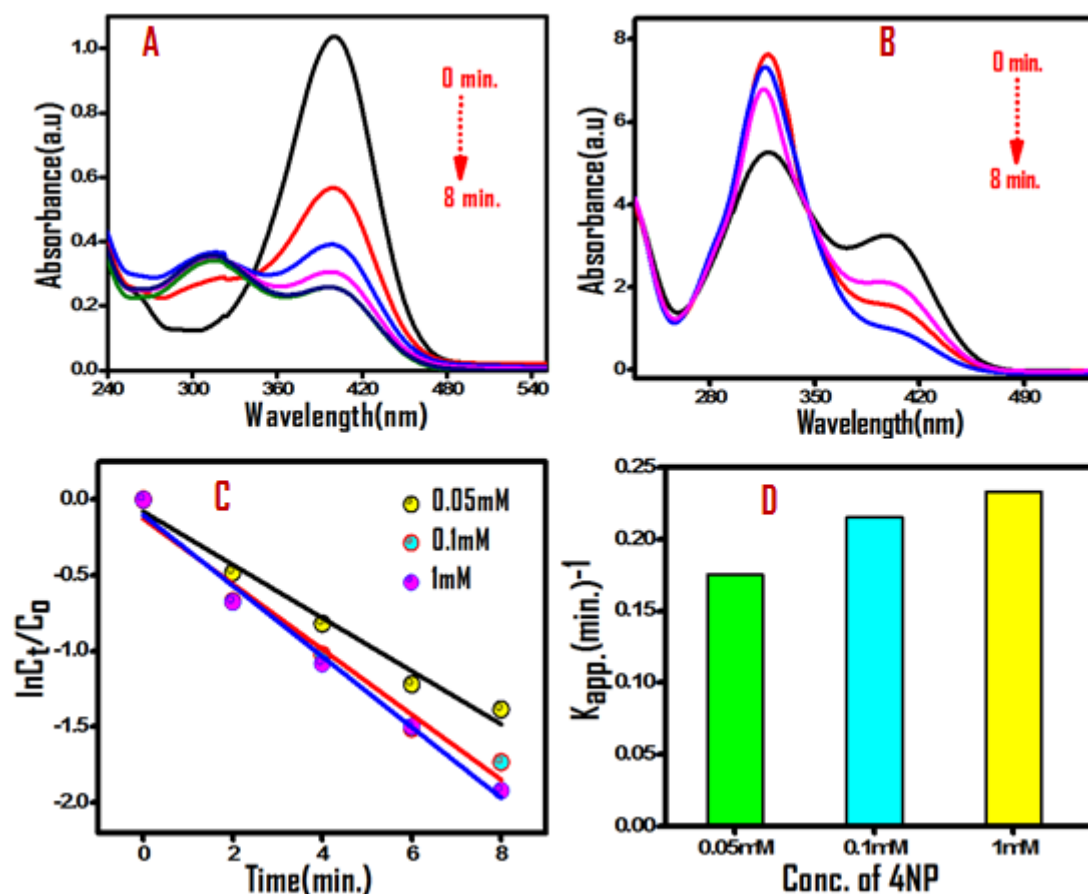

**Figure S15.** UV-Vis analysis of 4-NP solutions in the presence of fixed dosage of  $\text{NaBH}_4$  and PPY/PB catalyst (1 mM, 20 mg) and with varying concentrations of 4-NP: (A) 0.05 mM and (B) 1 mM. (C) Their kinetic plots and (D) comparison of their apparent rate constants obtained from the slope of pseudo-first order fit at different 4-NP concentrations .
